# Supplementary material for: The Darker the Better: Identification of Chemotype Profile in Soroses of Local and Introduced Mulberry Varieties with Respect to the Colour Type
Source: MDPI journal article supplement (doi:10.3390/foods12213985), 2023-10-31
Supplement: s1 [file s1]

**Supplementary Table S1.** List of local mulberry genotypes from Slovenia and Hungary planted in the mulberry collection of the Faculty of Agriculture University Maribor with location of their origin, geographic coordinates and detailed data along with the list and specification of reference sericultural and fruit varieties. The identification No. is defined by the abbreviation of the region (Slovenia) or county (Hungary). Slovenia: SE- Southeastern region, SM- Submediterranean region, SP- Subpannonean region; Hungary: BA- Baranya, BE- Bekes, GMS- Győr-Moson-Sopron, PE- Pest, SO-Somogy, TO-Tolna, VE-Veszprem, ZA-Zala;

| Group name/Ident. No.      | Colour | Region             | Detailed regionalization | Abb. | Detailed location | Sampling date | Lat. (° N) | Long. (° E) | CBH (cm) |
|----------------------------|--------|--------------------|--------------------------|------|-------------------|---------------|------------|-------------|----------|
| <b>Slovenian genotypes</b> |        |                    |                          |      |                   |               |            |             |          |
| SE 19.2                    | LP     | Southeastern       | Krška raven              | SE   | Brege             | 13.7.2016     | 45.921120  | 15.49817    | 152      |
| SE 9.1                     | B      | Southeastern       | Črnomelj                 | SE   | Marindol          | 6.7.2016      | 45.506130  | 15.328900   | 190      |
| SE 9.2                     | B      | Southeastern       | Črnomelj                 | SE   | Marindol          | 6.7.2016      | 45.506130  | 15.328900   | 190      |
| SM 208                     | YW     | Submediterranean   | Koprška brda             | SM   | Abitanti          | 29.6.2016     | 45.436550  | 13.825140   | 130      |
| SP 300                     | YW     | Subpannonean       | Dravska ravan            | SP   | Rošnja            | 8.6.2017      | 46.48013   | 15.74335    | 276      |
| SP 256                     | B      | Subpannonean       | Lendava                  | SP   | Dobrovnik         | 26.7.2016     | 46.655350  | 16.354410   | 178      |
| SP 272                     | RB     | Subpannonean       | Goričko                  | SP   | Bodonci           | 26.7.2016     | 46.744130  | 16.090650   | 178      |
| SP 306                     | B      | Subpannonean       | Haloze                   | SP   | Žetale            | 8.6.2017      | 46.273440  | 15.791595   | 160      |
| SP 249                     | YW     | Subpannonean       | Murska ravan             | SP   | Stara nova vas    | 20.7.2016     | 46.582110  | 16.117470   | 70       |
| SP 8                       | B      | Subpannonean       | Murska ravan             | SP   | Stogovci          | 20.7.2016     | 46.694120  | 15.834570   | 172      |
| SE 24                      | RB     | Southeastern       | Novomeška                | SE   | Ostrog            | 13.7.2016     | 45.856240  | 15.37738    | 275      |
| SE 290                     | B      | Southeastern       | Metlika                  | SE   | Vinomer-Drasici   | 2.8.2016      | 45.669010  | 15.364560   | 190      |
| SE 5                       | YW     | Southeastern       | Črnomelj                 | SE   | Castle Dragatus   | 6.7.2016      | 45.520700  | 15.159010   | 122      |
| SM 100.1                   | YW     | Submediterranean   | Kras                     | SM   | Castle Školj      | 23.5.2017     | 45.66090   | 14.00696    | 189      |
| SM 214                     | YW     | Submediterranean   | Goriška brda             | SM   | Medana .          | 4.7.2016      | 45.982020  | 13.519870   | 120      |
| SM 29                      | RB     | Submediterranean   | Vipavska                 | SM   | Potoče            | 27.5.2015     | 45.88809   | 13.821810   | /        |
| SP 10                      | YW     | Subpannonean       | Sloven. gorice           | SP   | Dražen vrh        | 20.7.2016     | 46.65360   | 15.799760   | 270      |
| SP 237                     | RB     | Subpannonean       | Sloven. gorice           | SP   | Zenik             | 20.7.2016     | 46.556780  | 16.012760   | 145      |
| <b>Hungarian genotypes</b> |        |                    |                          |      |                   |               |            |             |          |
| SO 1035                    | LP     | South Transdanubia | Somogy                   | SO   | Mernye            | 30.5.2017     | 46.516639  | 17.819101   | 2x65     |
| BA 2111                    | B      | South Transdanubia | Baranya                  | BA   | Szuliman          | 14.6.2017     | 46.123830  | 17.819420   | 265      |
| BA 2126                    | YW     | South Transdanubia | Baranya                  | BA   | Ketujfalu         | 14.6.2017     | 45.981790  | 17.732420   | 170      |

|                           |        |                      |                                      |    |                 |              |           |           |     |
|---------------------------|--------|----------------------|--------------------------------------|----|-----------------|--------------|-----------|-----------|-----|
| BA 2179                   | B      | South Transdanubia   | Baranya                              | BA | Dunaszekso      | 14.6.2017    | 46.066690 | 18.746480 | /   |
| BE 1264.2                 | PB     | Southern Great Plain | Bekes                                | BE | Bekescsaba      | 5.7.2017     | 46.684300 | 21.087600 | 182 |
| GMS 2357                  | YW     | Western Transdanubia | Gyor-Moson-Sopron                    | HU | Morichida       | 20.6.2017    | 47.517870 | 17.412390 | 236 |
| PE 4                      | YW     | Central Hungary      | Pest                                 | PE | Nosziop         | 29.11.2014   | 47.183340 | 17.458510 |     |
| PE 61214                  | RB     | Central Hungary      | Pest                                 | PE | Budapest        | 6.12.2014    | /         | /         | /   |
| SO 2008                   | PB     | South Transdanubia   | Somogy                               | SO | Csurgo          | 30.5.2017    | 46.247080 | 17.105960 | 120 |
| SO 2018                   | PB     | South Transdanubia   | Somogy                               | SO | Barcs           | 30.5.2017    | 45.985240 | 17.426230 | 310 |
| VA 1051                   | B      | Western Transdanubia | Vas                                  | VA | Apatisvanfalva  | 6.6.2017     | 46.942500 | 16.274500 | 142 |
| VA 1056                   | RB     | Western Transdanubia | Vas                                  | VA | Alsojanoshegyl  | 6.6.2017     | 46.886200 | 16.170000 | /   |
| VA 2570                   | LP     | Western Transdanubia | Vas                                  | VA | Sitke           | 20.6.2017    | 47.243470 | 17.023680 | 220 |
| VE 2620                   | YW     | Central Transdanubia | Veszprem                             | VE | Sumeg           | 27.6.2017    | 46.980800 | 17.290600 | 170 |
| ZA 2041                   | B      | Western Transdanubia | Zala                                 | ZA | Tornyiszentmik  | 6.6.2017     | 46.529500 | 16.559300 | 210 |
| ZA 2044                   | YW     | Western Transdanubia | Zala                                 | ZA | Szecsiziget     | 6.6.2017     | 46.592800 | 16.615050 | 60  |
| ZA 2045                   | RB     | Western Transdanubia | Zala                                 | ZA | Paka            | 6.6.2017     | 46.593750 | 16.648510 | 205 |
| ZA 2047                   | PB     | Western Transdanubia | Zala                                 | ZA | Radihaza        | 6.6.2017     | 46.649450 | 16.780080 | 110 |
| ZA 2053                   | RB     | Western Transdanubia | Zala                                 | ZA | Sojtor. Deak    | 6.6.2017     | 46.685670 | 16.856180 | 130 |
| ZA 2084                   | B      | Western Transdanubia | Zala                                 | ZA | Kiliman - Gelse | 6.6.2017     | 46.628430 | 16.995460 | 60  |
| ZA 2095                   | RB     | Western Transdanubia | Zala                                 | ZA | Szentmargitfalv | 6.6.2017     | 46.494230 | 16.656630 | 190 |
| Sericultural varieties    | Colour | Origin               | Obtained                             |    |                 | Prop./       | planting  | date      |     |
| Morus alba (L.) 'Florio'  | PB     | Italy                | mulberry gene bank CREA Padua, Italy |    |                 | 3.2015/10.20 |           | 15        |     |
| M. alba (L.) 'Kokusou'    | B      | Japan                | mulberry gene bank CREA Padua, Italy |    |                 | 3.2015/10.20 |           | 17        |     |
| M. alba (L.) 'Morettiana' | YW     | Italy                | mulberry gene bank CREA Padua, Italy |    |                 | 3.2015/10.20 |           | 18        |     |
| M. alba(L.) 'Muki'        | B      | /                    | mulberry gene bank CREA Padua, Italy |    |                 | 3.2015/10.20 |           | 18        |     |
| Fruit varieties           |        |                      |                                      |    |                 |              |           |           |     |
| M. alba 'Agathe'          | RB     | /                    | Rabensteiner J.                      |    |                 | 23.6.2018    |           |           |     |

|                                                            |    |                                              |                                                                                              |             |
|------------------------------------------------------------|----|----------------------------------------------|----------------------------------------------------------------------------------------------|-------------|
| <i>M. alba</i> 'Red'                                       | RB | /                                            | Rabensteiner J.                                                                              | 23.6.2018   |
| <i>M. alba</i> 'White'                                     | PB | /                                            | Hubmann (from a collector in Bulgaria)                                                       | /           |
| <i>M. alba</i> 'Шелл № 150'                                | PB | Hybrid from Ukraine.<br>Poltawa (Schell 150) | /                                                                                            | /           |
| <i>M. alba</i> s.l. 'Big Ten'                              | B  | /                                            | Pucher                                                                                       | /           |
| <i>M. alba</i> s.l. 'Black'                                | B  | Hybrid from Romania                          | Hubmann (collector in Bulgaria)                                                              | /           |
| <i>M. alba</i> s.l. 'CREA fruit<br>selection'              | B  | /                                            | mulberry gene bank CREA Padua. Italy                                                         | 1.3.2015    |
| <i>M. alba</i> s.l. 'Yellow Roso'                          | B  | /                                            | Hubman                                                                                       | 2014/3.2016 |
| <i>M. indica</i> 'Coree'                                   | B  | Variety from France                          | Hubmann (originally from a collector in Turkey)                                              | /           |
| <i>M. indica</i> 'Shin-Tso'                                | B  | /                                            | Hubmann (originally from cornusmas.eu)                                                       | /           |
| <i>M. alba</i> × <i>rubra</i>                              | RB | Hybrid                                       | Hubmann. Austria (original from tree in Graz)                                                | 2014/3.2016 |
| <i>M. alba</i> × <i>M. rubra</i><br>'Illinois Everbearing' | RB | Unknown                                      | Pucher                                                                                       | /           |
| <i>M. alba</i> × <i>M. rubra</i> 'Ivory'                   | B  | Hybrid from Canada                           | Hubmann (original introduced via hortensis.de)                                               | /           |
| <i>M. alba</i> × <i>M. rubra</i> 'Frech<br>Hybrid'         | RB | Hybrid from France                           | Pucher (original <a href="http://www.cochetfrederic.com">http://www.cochetfrederic.com</a> ) | /           |
| <i>M. nigra</i>                                            | B  | Local genotype. East Styria.<br>Austria      | Pucher, Austria. lat.46.97057256490299, long.<br>15.70354170496526                           | 2014/3.2016 |

**Supplementary Table S2:** The mean concentrations of the sugars and organic acids (mg/100 g FW) in soroses of Slovenian, Hungarian old mulberry genotypes, sericultural and fruit varieties.

| Group name/Identification No.       | Glucose | Xylose | Fructose | Citric acid | Tartaric acid | Malic acid | Succinic acid | Lactic acid | Fumaric acid | Acetic acid |
|-------------------------------------|---------|--------|----------|-------------|---------------|------------|---------------|-------------|--------------|-------------|
| <b>Slovenian mulberry genotypes</b> |         |        |          |             |               |            |               |             |              |             |
| SE 5                                | 2018.62 | 2.63   | 2218.52  | 38.54       | 0.00          | 66.17      | 4.31          | 12.92       | 22.24        | 1.08        |
| SE 9.1                              | 1544.71 | 1.58   | 1673.90  | 138.49      | 26.86         | 76.76      | 108.91        | 8.35        | 4.52         | 0.00        |
| SE 9.2                              | 1930.79 | 0.00   | 2025.65  | 68.87       | 29.99         | 95.07      | 108.01        | 0.00        | 11.25        | 5.24        |
| SE 19.2                             | 2463.59 | 5.17   | 2689.97  | 20.57       | 22.89         | 103.15     | 153.55        | 41.39       | 25.75        | 3.25        |
| SE 24                               | 1795.05 | 7.39   | 1944.13  | 61.81       | 22.95         | 74.64      | 143.10        | 11.60       | 14.41        | 4.92        |
| SE 290                              | 1939.38 | 1.91   | 2146.87  | 88.80       | 16.45         | 91.16      | 136.56        | 8.43        | 8.07         | 6.89        |
| SM 29                               | 1528.43 | 0.00   | 1640.71  | 35.05       | 17.17         | 75.37      | 166.95        | 15.36       | 23.08        | 4.47        |
| SM 100.1                            | 3799.46 | 15.22  | 4019.71  | 0.00        | 0.00          | 112.66     | 10.60         | 14.87       | 37.57        | 0.00        |
| SM 208                              | 2691.46 | 33.82  | 2908.13  | 48.05       | 10.05         | 87.83      | 384.74        | 11.95       | 31.74        | 4.07        |
| SM 214                              | 2593.72 | 13.05  | 2694.87  | 0.00        | 0.00          | 104.98     | 10.11         | 32.93       | 24.10        | 294.04      |
| SP 8                                | 2562.88 | 6.18   | 2757.85  | 97.73       | 17.69         | 105.44     | 189.94        | 9.66        | 7.44         | 7.18        |
| SP 10                               | 2807.91 | 7.48   | 3092.26  | 27.10       | 22.07         | 151.54     | 225.62        | 8.55        | 16.66        | 9.00        |
| SP 237                              | 1198.00 | 0.00   | 1251.34  | 37.89       | 16.76         | 69.26      | 198.17        | 5.81        | 10.12        | 5.18        |
| SP 249                              | 1023.02 | 1.93   | 1117.22  | 0.00        | 0.00          | 48.27      | 23.36         | 3.79        | 5.39         | 18.16       |
| SP 256                              | 1236.73 | 2.95   | 1307.16  | 85.01       | 8.92          | 69.50      | 115.85        | 7.63        | 6.00         | 1.94        |
| SP 272                              | 1744.40 | 4.61   | 1925.36  | 185.86      | 0.00          | 66.47      | 5.30          | 0.00        | 10.97        | 5.58        |
| SP 300                              | 2285.83 | 13.75  | 2495.02  | 0.00        | 0.00          | 78.72      | 9.09          | 10.72       | 29.36        | 123.32      |
| SP 306                              | 1289.79 | 3.88   | 1452.17  | 0.00        | 0.00          | 73.28      | 3.99          | 14.73       | 1.44         | 34.24       |
| <b>Hungarian mulberry genotypes</b> |         |        |          |             |               |            |               |             |              |             |
| BA 2111                             | 1499.59 | 0.00   | 1561.71  | 0.00        | 0.00          | 47.23      | 8.81          | 0.00        | 0.58         | 23.69       |
| BA 2126                             | 3118.24 | 11.68  | 3549.88  | 0.00        | 0.00          | 119.75     | 21.44         | 62.83       | 17.17        | 41.37       |
| BA 2179                             | 2565.76 | 4.69   | 2788.18  | 180.67      | 18.04         | 123.27     | 141.42        | 85.83       | 5.24         | 4.62        |
| BE 1264.2                           | 1830.04 | 7.79   | 2131.42  | 0.00        | 0.00          | 72.38      | 14.92         | 1.43        | 12.04        | 16.53       |

|                                             |         |       |         |        |       |        |        |        |       |       |
|---------------------------------------------|---------|-------|---------|--------|-------|--------|--------|--------|-------|-------|
| GMS 2357                                    | 1835.75 | 0.00  | 1998.16 | 0.00   | 0.00  | 71.73  | 21.95  | 4.32   | 21.83 | 16.31 |
| PE 4                                        | 2807.47 | 4.97  | 2962.91 | 45.58  | 10.09 | 147.49 | 210.42 | 17.17  | 25.46 | 3.84  |
| PE 61214                                    | 1671.73 | 5.22  | 1820.46 | 102.56 | 20.15 | 64.48  | 123.09 | 2.43   | 2.28  | 7.82  |
| SO 1035                                     | 2793.15 | 13.20 | 3002.85 | 0.00   | 0.00  | 84.47  | 8.56   | 16.01  | 30.17 | 10.96 |
| SO 2008                                     | 1846.33 | 12.93 | 2069.26 | 41.18  | 20.98 | 61.73  | 139.76 | 16.90  | 25.33 | 6.46  |
| SO 2018                                     | 1552.48 | 4.91  | 1688.82 | 39.69  | 10.67 | 91.75  | 134.95 | 0.22   | 18.38 | 4.61  |
| VA 1051                                     | 1583.30 | 0.00  | 1687.67 | 68.92  | 19.01 | 83.78  | 61.96  | 0.44   | 6.57  | 3.91  |
| VA 1056                                     | 1918.27 | 2.11  | 2186.73 | 0.00   | 0.00  | 85.74  | 12.30  | 26.70  | 24.84 | 53.14 |
| VA 2570                                     | 1503.72 | 8.43  | 1641.00 | 112.76 | 30.70 | 86.43  | 312.10 | 38.07  | 25.99 | 0.00  |
| VE 2620                                     | 2588.49 | 7.21  | 2834.23 | 0.00   | 0.00  | 99.18  | 32.69  | 13.34  | 40.53 | 82.35 |
| ZA 2041                                     | 0.00    | 0.00  | 0.00    | 104.34 | 12.33 | 72.49  | 120.89 | 12.49  | 12.30 | 2.12  |
| ZA 2044                                     | 883.84  | 1.83  | 988.54  | 0.00   | 0.00  | 41.32  | 76.51  | 8.17   | 4.22  | 30.88 |
| ZA 2045                                     | 2137.28 | 7.07  | 2313.41 | 121.50 | 16.97 | 80.97  | 209.80 | 24.12  | 9.01  | 8.75  |
| ZA 2047                                     | 2431.70 | 7.76  | 2668.71 | 99.57  | 24.25 | 132.70 | 413.52 | 7.13   | 20.71 | 14.52 |
| ZA 2053                                     | 2871.91 | 5.65  | 3088.68 | 173.18 | 20.93 | 120.01 | 168.46 | 7.40   | 1.57  | 2.66  |
| ZA2084                                      | 2047.92 | 9.55  | 2288.07 | 0.00   | 0.00  | 71.36  | 2.76   | 1.16   | 4.14  | 30.59 |
| ZA2095                                      | 1093.67 | 9.62  | 1244.89 | 442.32 | 45.71 | 45.88  | 73.25  | 14.45  | 9.92  | 0.00  |
| <b>Reference sericultural varieties</b>     |         |       |         |        |       |        |        |        |       |       |
| <i>Morus alba</i> (L.) 'Florio'             | 3149.85 | 7.70  | 3266.78 | 51.75  | 21.47 | 109.41 | 219.47 | 57.84  | 26.60 | 8.38  |
| <i>M. alba</i> (L.) 'Kokusou'               | 1542.85 | 0.00  | 1608.73 | 384.94 | 0.49  | 132.60 | 83.79  | 218.29 | 6.80  | 14.27 |
| <i>M. alba</i> (L.) 'Morettiana'            | 2542.33 | 0.00  | 2746.32 | 0.00   | 0.00  | 75.35  | 30.30  | 11.07  | 38.93 | 11.83 |
| <i>M. alba</i> (L.) 'Muki'                  | 2400.94 | 0.00  | 2569.92 | 115.76 | 33.60 | 135.54 | 361.83 | 295.16 | 0.11  | 11.34 |
| <b>Fruit varieties</b>                      |         |       |         |        |       |        |        |        |       |       |
| <i>M. alba</i> (L.) 'Agathe'                | 1330.07 | 4.35  | 1428.17 | 138.88 | 14.91 | 85.61  | 230.38 | 61.12  | 14.96 | 2.56  |
| <i>M. alba</i> (L.) 'Red'                   | 2794.77 | 0.00  | 2935.47 | 627.15 | 17.54 | 148.65 | 213.70 | 80.47  | 4.02  | 45.50 |
| <i>M. alba</i> (L.) 'White'                 | 1768.83 | 2.22  | 1846.24 | 60.05  | 9.56  | 106.57 | 146.83 | 10.72  | 30.65 | 2.47  |
| <i>M. alba</i> (L.) M 150/N 01 'Шелл № 150' | 1458.87 | 2.84  | 1556.55 | 165.31 | 10.77 | 114.15 | 166.89 | 22.76  | 18.27 | 5.80  |
| <i>M. alba</i> (L.) s.l. 'Big Ten'          | 1713.43 | 0.81  | 1875.69 | 137.33 | 0.00  | 111.08 | 1.56   | 0.00   | 2.56  | 54.29 |

|                                                         |         |       |         |         |       |        |        |        |      |        |
|---------------------------------------------------------|---------|-------|---------|---------|-------|--------|--------|--------|------|--------|
| <i>M. alba</i> (L.) s.l. 'Black'                        | 1963.92 | 6.96  | 2083.23 | 380.60  | 27.38 | 90.88  | 72.92  | 106.29 | 4.72 | 10.35  |
| <i>M. alba</i> (L.) s.l. 'CREA fruit selection'         | 1876.15 | 3.07  | 1959.48 | 159.69  | 0.00  | 42.98  | 1.75   | 3.34   | 3.24 | 15.42  |
| <i>M. alba</i> (L.) s.l. 'Yellow roso'                  | 3061.22 | 1.60  | 3178.50 | 175.37  | 0.10  | 139.69 | 279.28 | 16.93  | 9.21 | 5.02   |
| <i>M. indica</i> (L.) 'Coree'                           | 2819.16 | 3.46  | 2984.25 | 445.27  | 0.00  | 155.56 | 139.51 | 76.42  | 4.36 | 10.41  |
| <i>M. indica</i> (L.) 'Shin-Tso'                        | 3756.17 | 10.24 | 4088.94 | 352.48  | 0.00  | 74.52  | 2.10   | 0.00   | 2.51 | 17.26  |
| <i>M. alba</i> × <i>rubra</i>                           | 2949.34 | 0.87  | 3179.71 | 557.24  | 0.21  | 182.86 | 47.70  | 192.37 | 0.66 | 7.03   |
| <i>M. alba</i> × <i>M. rubra</i> 'Illinois Everbearing' | 2616.13 | 0.00  | 2694.87 | 613.53  | 0.08  | 123.98 | 68.92  | 74.34  | 2.60 | 3.82   |
| <i>M. alba</i> × <i>M. rubra</i> 'Ivory'                | 2624.42 | 2.23  | 2782.96 | 404.95  | 3.76  | 143.06 | 113.73 | 70.05  | 5.54 | 52.51  |
| <i>M. alba</i> × <i>M. rubra</i> French hybrid          | 2707.29 | 3.79  | 2882.79 | 480.95  | 0.68  | 135.40 | 43.25  | 175.16 | 0.77 | 8.36   |
| <i>M. nigra</i> (L.)                                    | 1747.28 | 4.14  | 1925.96 | 1058.76 | 0.00  | 71.28  | 3.56   | 0.00   | 0.71 | 132.44 |

**Supplementary Table S3:** Two way ANOVA results for the effect of species and soroses colour types on different biochemical traits.

|                      | df | F     | Sig.             |
|----------------------|----|-------|------------------|
| <b>Fructose</b>      |    |       |                  |
| species              | 3  | 4.55  | <b>0.006</b>     |
| colour               | 4  | 2.39  | 0.061            |
| species * colour     | 1  | 0.28  | 0.597            |
| <b>Glucose</b>       |    |       |                  |
| species              | 3  | 4.49  | <b>0.007</b>     |
| colour               | 4  | 1.79  | 0.145            |
| species * colour     | 1  | 0.81  | 0.371            |
| <b>Xylose</b>        |    |       |                  |
| species              | 3  | 0.10  | 0.962            |
| colour               | 4  | 3.23  | <b>0.018</b>     |
| species * colour     | 1  | 0.69  | 0.409            |
| <b>Citric acid</b>   |    |       |                  |
| species              | 3  | 16.60 | <b>&lt;0.001</b> |
| colour               | 4  | 3.79  | <b>0.008</b>     |
| species * colour     | 1  | 5.90  | <b>0.018</b>     |
| <b>Fumaric acid</b>  |    |       |                  |
| species              | 3  | 0.75  | 0.528            |
| colour               | 4  | 15.6  | <b>&lt;0.001</b> |
| colour * species     | 1  | 1.08  | 0.304            |
| <b>Tartaric acid</b> |    |       |                  |
| species              | 3  | 3.65  | <b>0.018</b>     |
| colour               | 4  | 2.42  | 0.059            |
| species * colour     | 1  | 0.13  | 0.725            |

|                                      | df | F    | Sig.             |
|--------------------------------------|----|------|------------------|
| <b>Quercetin-rutinoside hexoside</b> |    |      |                  |
| species                              | 3  | 0.53 | 0.667            |
| colour                               | 4  | 3.30 | <b>0.017</b>     |
| species * colour                     | 1  | 11.1 | <b>0.001</b>     |
| <b>Quercetin dihexoside</b>          |    |      |                  |
| species                              | 3  | 8.58 | <b>&lt;0.001</b> |
| colour                               | 4  | 5.28 | <b>0.001</b>     |
| species * colour                     | 1  | 24.8 | <b>&lt;0.001</b> |
| <b>Kaempferol hexoside</b>           |    |      |                  |
| species                              | 3  | 3.82 | <b>0.014</b>     |
| colour                               | 4  | 6.25 | <b>&lt;0.001</b> |
| species * colour                     | 1  | 4.83 | <b>0.032</b>     |
| <b>Kaempferol-3-rutinoside</b>       |    |      |                  |
| species                              | 3  | 0.73 | 0.537            |
| colour                               | 4  | 2.40 | 0.06             |
| species * colour                     | 1  | 5.58 | <b>0.021</b>     |
| <b>Laricitrin hexoside</b>           |    |      |                  |
| species                              | 3  | 2.91 | <b>0.042</b>     |
| colour                               | 4  | 3.54 | <b>0.012</b>     |
| species * colour                     | 1  | 0.73 | 0.395            |
| <b>Epicatechin</b>                   |    |      |                  |
| species                              | 3  | 2.54 | 0.065            |
| colour                               | 4  | 4.05 | <b>0.006</b>     |
| species * colour                     | 1  | 3.13 | 0.082            |

| 5-Caffeoylquinic acid 1 (Chlorogenic acid) |   |       |                  |  |
|--------------------------------------------|---|-------|------------------|--|
| species                                    | 3 | 0.16  | 0.921            |  |
| colour                                     | 4 | 4.64  | <b>0.003</b>     |  |
| species * colour                           | 1 | 6.94  | <b>0.011</b>     |  |
| Caffeoylquinic acids                       |   |       |                  |  |
| species                                    | 3 | 3.28  | <b>0.029</b>     |  |
| colour                                     | 4 | 5.55  | <b>&lt;0.001</b> |  |
| species * colour                           | 1 | 0.11  | 0.741            |  |
| Caffeic acid derivatives                   |   |       |                  |  |
| species                                    | 3 | 8.36  | <b>&lt;0.001</b> |  |
| colour                                     | 4 | 1.04  | 0.397            |  |
| species * colour                           | 1 | 4.96  | <b>0.031</b>     |  |
| Coumaroylquinic acids                      |   |       |                  |  |
| species                                    | 3 | 5.24  | <b>0.003</b>     |  |
| colour                                     | 4 | 3.52  | <b>0.013</b>     |  |
| species * colour                           | 1 | 2.84  | 0.098            |  |
| p-coumaric acid derivatives                |   |       |                  |  |
| species                                    | 3 | 6.44  | <b>&lt;0.001</b> |  |
| colour                                     | 4 | 2.81  | <b>0.035</b>     |  |
| species * colour                           | 1 | 11.40 | <b>0.001</b>     |  |
| Feruloylquinic acids                       |   |       |                  |  |
| species                                    | 3 | 3.93  | <b>0.014</b>     |  |
| colour                                     | 4 | 1.18  | 0.332            |  |
| species * colour                           | 1 | 0.11  | 0.743            |  |
| Quercetin-3-galactoside                    |   |       |                  |  |
| species                                    | 3 | 0.37  | 0.773            |  |
| colour                                     | 4 | 1.30  | 0.279            |  |

| Procyanidin dimer 1   |   |       |                  |  |
|-----------------------|---|-------|------------------|--|
| species               | 3 | 2.71  | 0.053            |  |
| colour                | 4 | 7.25  | <b>&lt;0.001</b> |  |
| species * colour      | 1 | 2.07  | 0.155            |  |
| Naringenin hexoside 1 |   |       |                  |  |
| species               | 3 | 2.62  | 0.059            |  |
| colour                | 4 | 6.42  | <b>&lt;0.001</b> |  |
| species * colour      | 1 | 0.02  | 0.896            |  |
| Naringenin hexoside 2 |   |       |                  |  |
| species               | 3 | 1.29  | 0.286            |  |
| colour                | 4 | 26.40 | <b>&lt;0.001</b> |  |
| species * colour      | 1 | 0.24  | 0.623            |  |
| Naringenin hexoside 3 |   |       |                  |  |
| species               | 3 | 0.54  | 0.657            |  |
| colour                | 4 | 19.2  | <b>&lt;0.001</b> |  |
| species * colour      | 1 | 0.01  | 0.958            |  |
| Isoharmnetin hexoside |   |       |                  |  |
| species               | 3 | 3.73  | <b>0.016</b>     |  |
| colour                | 4 | 3.60  | <b>0.011</b>     |  |
| species * colour      | 1 | 1.94  | 0.169            |  |
| Cyanidin-3-glucoside  |   |       |                  |  |
| species               | 3 | 6.78  | <b>&lt;0.001</b> |  |
| colour                | 4 | 14.30 | <b>&lt;0.001</b> |  |
| species * colour      | 1 | 4.40  | <b>0.040</b>     |  |
| Cyanidin-3-rutinoside |   |       |                  |  |
| species               | 3 | 3.09  | <b>0.034</b>     |  |
| colour                | 4 | 10.30 | <b>&lt;0.001</b> |  |



|                               |   |      |                  |
|-------------------------------|---|------|------------------|
| species * colour              | 1 | 5.29 | <b>0.026</b>     |
| <b>Quercetin-3-rutinoside</b> |   |      |                  |
| species                       | 3 | 4.37 | <b>0.008</b>     |
| colour                        | 4 | 8.19 | <b>&lt;0.001</b> |
| species * colour              | 1 | 0.01 | 0.928            |
| <b>Quercetin-3-xyloside</b>   |   |      |                  |
| species                       | 3 | 2.12 | 0.107            |
| colour                        | 4 | 3.13 | <b>0.021</b>     |
| species * colour              | 1 | 6.05 | <b>0.017</b>     |

|                                 |   |       |                  |
|---------------------------------|---|-------|------------------|
| species * colour                | 1 | 3.69  | 0.060            |
| <b>Pelargonidin-3-glucoside</b> |   |       |                  |
| species                         | 3 | 4.02  | <b>0.011</b>     |
| colour                          | 4 | 10.50 | <b>&lt;0.001</b> |
| species * colour                | 1 | 1.73  | 0.194            |
| <b>Total phenolics</b>          |   |       |                  |
| species                         | 3 | 1.52  | 0.220            |
| colour                          | 4 | 30.10 | <b>&lt;0.001</b> |
| species * colour                | 1 | 1.92  | 0.171            |

**Supplementary Table S4.** Negative molecular ion mode ([M-H]<sup>-</sup>) and MS<sup>2</sup> fragmentation data of individual phenolic compounds in mulberry leaves detected by HPLC-MS.

| <b>Caffeoylquinic acids</b>                       | <b>[MH]<sup>+</sup> or [MH]<sup>-</sup></b> | <b>MS<sup>2</sup></b> |
|---------------------------------------------------|---------------------------------------------|-----------------------|
| 3-Caffeoylquinic acid                             | 353                                         | 191, 179, 135         |
| 4-Caffeoylquinic acid                             | 353                                         | 173, 179, 191         |
| 5-Caffeoylquinic acid 1 (chlorogenic acid)        | 353                                         | 191, 179              |
| 5-Caffeoylquinic acid 2                           | 353                                         | 191, 179              |
| Dicaffeoylquinic acid 1                           | 515                                         | 353, 191, 179, 173    |
| Dicaffeoylquinic acid 2                           | 515                                         | 353, 191, 173         |
| Dicaffeoylquinic acid 3                           | 515                                         | 353, 173, 179, 191    |
| <b>Caffeic acid and its derivatives</b>           |                                             |                       |
| Caffeic acid                                      | 179                                         | 135                   |
| Caffeic acid hexoside 1                           | 341                                         | 179, 161              |
| Caffeic acid hexoside 2                           | 341                                         | 179, 161              |
| <b>Coumaroylquinic acids</b>                      |                                             |                       |
| 3- <i>p</i> -Coumaroylquinic acid                 | 337                                         | 163, 191, 173         |
| 4- <i>p</i> -Coumaroylquinic acid                 | 337                                         | 173, 163, 191         |
| 5- <i>p</i> -Coumaroylquinic acid 1               | 337                                         | 191, 173, 163         |
| 5- <i>p</i> -Coumaroylquinic acid 2               | 337                                         | 191, 173, 163         |
| <b><i>p</i>-coumaric acid and its derivatives</b> |                                             |                       |
| <i>p</i> -Coumaric acid                           | 163                                         | 119                   |
| <i>p</i> -Coumaric acid hexoside                  | 325                                         | 163                   |
| <b>Feruloylquinic acids</b>                       |                                             |                       |
| 3-Feruloylquinic acid                             | 367                                         | 193, 134              |
| 5-Feruloylquinic acid                             | 367                                         | 193, 191, 173         |
| <b>Protocatechuic acid</b>                        | 153                                         | 109                   |
| <b>Flavonoids</b>                                 |                                             |                       |
| <b>Flavonols</b>                                  |                                             |                       |

|                               |     |                    |
|-------------------------------|-----|--------------------|
| <b>Quercetin derivatives</b>  |     |                    |
| Quercetin-3-galactoside       | 463 | 301                |
| Quercetin-3-glucoside         | 463 | 301                |
| Quercetin-3-rutinoside        | 609 | 301                |
| Quercetin-3-xyloside          | 433 | 301                |
| Quercetin-rutinoside hexoside | 771 | 301                |
| Quercetin                     | 301 | 179, 151           |
| Quercetin dihexoside          | 625 | 301                |
| Quercetin malonylglucoside    | 549 | 463, 301           |
| Quercetin rhamnosylhexoside   | 755 | 609, 301           |
| <b>Kaempferol derivatives</b> |     |                    |
| Kaempferol hexoside           | 447 | 285                |
| Kaempferol-3-rutinoside       | 593 | 447, 285           |
| Laricitrin hexoside           | 493 | 331                |
| <b>Flavanols</b>              |     |                    |
| Catechin                      | 289 | 245                |
| Epicatechin                   | 289 | 245                |
| Procyanidin dimer 1           | 577 | 451, 425, 407, 289 |
| Procyanidin dimer 2           | 577 | 451, 425, 407, 289 |
| <b>Flavanons</b>              |     |                    |
| Naringenin derivatives        |     |                    |
| Naringenin hexoside 1         | 433 | 271                |
| Naringenin hexoside 2         | 433 | 271                |
| Naringenin hexoside 3         | 433 | 271                |
| <b>Flavones</b>               |     |                    |
| Isorhamnetin hexoside         | 477 | 315                |
| <b>Anthocyanins</b>           |     |                    |
| Cyanidin-3-glucoside          | 449 | 287                |

|                           |     |                   |
|---------------------------|-----|-------------------|
| Cyanidin-3-rutinoside     | 595 | 449, 287          |
| Cyanidin-3-sophoroside    | 611 | 287, 181, 153     |
| Pelargonidin-3-glucoside  | 433 | 271               |
| Pelargonidin-3-rutinoside | 579 | 271, 215, 153, 91 |
| Peonidin-3-rutinoside     | 609 | 301               |
| Petunidin-3-glucoside     | 479 | 317               |

---

**Supplementary Table S5:** The mean concentrations of the total phenolics and phenolic acids (mg/100 g FW) in soroses of Slovenian, Hungarian old mulberry genotypes, sericultural and fruit varieties.

| Group name/Identification No.       | Total phenolics | Caffeoylquinic acids | Caffeic a. derivatives | Coumaroylquinic acids | <i>p</i> -coumaric a. der. | Feruloylquinic acids | protocatechuic a. |
|-------------------------------------|-----------------|----------------------|------------------------|-----------------------|----------------------------|----------------------|-------------------|
| <b>Slovenian mulberry genotypes</b> |                 |                      |                        |                       |                            |                      |                   |
| SE 5                                | 217.450         | 6.088                | 0.179                  | 0.703                 | 0.204                      | 0.019                | 0.016             |
| SE 9.1.                             | 436.853         | 25.949               | 0.290                  | 1.522                 | 0.071                      | 0.030                | 0.012             |
| SE 9.2.                             | 438.730         | 18.855               | 0.216                  | 1.149                 | 0.125                      | 0.016                | 0.013             |
| SE 19.2                             | 253.708         | 14.715               | 0.267                  | 1.760                 | 0.284                      | 0.019                | 0.016             |
| SE 24                               | 268.156         | 16.823               | 0.152                  | 1.103                 | 0.038                      | 0.032                | 0.010             |
| SE 290                              | 450.273         | 20.563               | 0.232                  | 1.756                 | 0.116                      | 0.027                | 0.013             |
| SM 29                               | 291.208         | 15.303               | 0.198                  | 1.148                 | 0.023                      | 0.029                | 0.007             |
| SM 100.1                            | 251.310         | 10.822               | 0.286                  | 0.582                 | 0.239                      | 0.006                | 0.017             |
| SM 208                              | 231.360         | 15.436               | 0.136                  | 0.934                 | 0.044                      | 0.012                | 0.015             |
| SM 214                              | 253.013         | 16.472               | 0.300                  | 1.853                 | 0.015                      | 0.034                | 0.015             |
| SP 8                                | 433.005         | 20.925               | 0.238                  | 1.636                 | 0.050                      | 0.028                | 0.013             |
| SP 10                               | 233.068         | 13.032               | 0.188                  | 0.864                 | 0.264                      | 0.016                | 0.018             |
| SP 237                              | 256.930         | 10.609               | 0.076                  | 0.995                 | 0.006                      | 0.020                | 0.008             |
| SP 249                              | 220.393         | 8.407                | 0.124                  | 0.495                 | 0.009                      | 0.005                | 1.660             |
| SP 256                              | 500.765         | 30.997               | 0.446                  | 1.691                 | 0.210                      | 0.020                | 0.014             |
| SP 272                              | 353.865         | 18.013               | 0.199                  | 1.229                 | 0.082                      | 0.031                | 0.008             |
| SP 300                              | 232.390         | 17.824               | 0.262                  | 0.964                 | 0.260                      | 0.016                | 0.015             |
| SP 306                              | 354.868         | 29.489               | 0.323                  | 2.454                 | 0.076                      | 0.041                | 0.012             |
| <b>Hungarian mulberry genotypes</b> |                 |                      |                        |                       |                            |                      |                   |
| BA 2111                             | 456.500         | 43.893               | 0.449                  | 2.883                 | 0.007                      | 0.035                | 0.013             |
| BA 2126                             | 210.245         | 4.173                | 0.201                  | 0.478                 | 0.178                      | 0.005                | 0.020             |
| BA 2179                             | 401.195         | 12.138               | 0.156                  | 0.881                 | 0.023                      | 0.009                | 0.012             |

|           |         |        |       |       |       |       |       |
|-----------|---------|--------|-------|-------|-------|-------|-------|
| BE 1264.2 | 308.330 | 23.665 | 0.844 | 3.610 | 0.100 | 0.034 | 0.007 |
| GMS 2357  | 230.888 | 11.724 | 0.368 | 0.639 | 0.177 | 0.010 | 0.017 |
| PE 4      | 221.785 | 10.937 | 0.092 | 0.766 | 0.023 | 0.009 | 0.017 |
| PE 61214  | 463.925 | 26.682 | 0.476 | 1.504 | 0.707 | 0.051 | 0.003 |
| SO 1035   | 242.804 | 12.803 | 0.245 | 1.760 | 0.162 | 0.016 | 0.013 |
| SO 2008   | 243.820 | 18.279 | 0.203 | 2.002 | 0.010 | 0.023 | 0.006 |
| SO 2018   | 236.175 | 8.134  | 0.120 | 0.813 | 0.013 | 0.018 | 0.008 |
| VA 1051   | 401.653 | 22.504 | 0.318 | 1.426 | 0.122 | 0.022 | 0.012 |
| VA 1056   | 331.830 | 15.461 | 0.179 | 1.298 | 0.010 | 0.036 | 0.011 |
| VA 2570   | 233.710 | 15.510 | 0.281 | 1.645 | 0.141 | 0.013 | 0.017 |
| VE 2620   | 205.250 | 2.571  | 0.085 | 0.644 | 0.119 | 0.003 | 0.017 |
| ZA 2041   | 446.983 | 33.507 | 0.406 | 1.423 | 0.501 | 0.020 | 0.012 |
| ZA 2044   | 234.875 | 15.657 | 0.326 | 0.792 | 0.033 | 0.015 | 0.015 |
| ZA 2045   | 288.335 | 12.914 | 0.127 | 1.100 | 0.011 | 0.025 | 0.008 |
| ZA 2047   | 220.525 | 13.963 | 0.190 | 1.908 | 0.019 | 0.021 | 0.006 |
| ZA 2053   | 442.708 | 35.449 | 0.574 | 2.751 | 0.592 | 0.072 | 0.008 |
| ZA 2084   | 438.235 | 18.377 | 0.339 | 1.673 | 0.180 | 0.026 | 0.013 |
| ZA 2095   | 472.955 | 52.677 | 0.686 | 3.285 | 0.092 | 0.168 | 0.003 |

#### Reference sericultural varieties

|                                  |         |        |       |       |       |       |       |
|----------------------------------|---------|--------|-------|-------|-------|-------|-------|
| <i>Morus alba</i> (L.) 'Florio'  | 281.280 | 21.403 | 0.205 | 2.588 | 0.061 | 0.033 | 0.007 |
| <i>M. alba</i> (L.) 'Kokusou'    | 408.390 | 29.543 | 0.363 | 1.833 | 0.083 | 0.030 | 0.012 |
| <i>M. alba</i> (L.) 'Morettiana' | 261.738 | 7.512  | 0.189 | 0.448 | 0.096 | 0.010 | 0.022 |
| <i>M. alba</i> (L.) 'Muki'       | 476.863 | 20.227 | 0.314 | 0.763 | 0.072 | 0.016 | 0.014 |

#### Fruit varieties

|                                             |         |        |       |       |       |       |       |
|---------------------------------------------|---------|--------|-------|-------|-------|-------|-------|
| <i>M. alba</i> (L.) 'Agathe'                | 288.718 | 25.592 | 0.441 | 5.169 | 0.218 | 0.062 | 0.026 |
| <i>M. alba</i> (L.) 'Red'                   | 389.373 | 35.375 | 0.126 | 5.205 | 0.054 | 0.153 | 0.009 |
| <i>M. alba</i> (L.) 'White'                 | 290.850 | 14.077 | 0.168 | 1.599 | 0.155 | 0.032 | 0.007 |
| <i>M. alba</i> (L.) M 150/N 01 'Шеда № 150' | 253.630 | 13.413 | 0.346 | 5.364 | 0.195 | 0.016 | 0.011 |

|                                                         |         |        |       |       |       |       |       |
|---------------------------------------------------------|---------|--------|-------|-------|-------|-------|-------|
| <i>M. alba</i> (L.) s.l. 'Big Ten'                      | 479.645 | 31.979 | 0.726 | 5.333 | 0.338 | 0.377 | 0.005 |
| <i>M. alba</i> (L.) s.l. 'Black'                        | 397.946 | 25.894 | 0.325 | 2.324 | 0.643 | 0.016 | 0.008 |
| <i>M. alba</i> (L.) s.l. 'CREA fruit selection'         | 471.639 | 45.201 | 1.031 | 3.366 | 0.187 | 0.023 | 0.029 |
| <i>M. alba</i> (L.) s.l. 'Yellow roso'                  | 447.621 | 27.639 | 0.545 | 1.533 | 0.156 | 0.020 | 0.028 |
| <i>M. indica</i> (L.) 'Coree'                           | 378.274 | 14.689 | 0.257 | 4.106 | 0.108 | 0.127 | 0.005 |
| <i>M. indica</i> (L.) 'Shin-Tso'                        | 536.380 | 12.086 | 0.375 | 3.915 | 0.076 | 0.037 | 0.010 |
| <i>M. alba</i> × <i>rubra</i>                           | 447.643 | 54.962 | 0.944 | 8.716 | 0.906 | 0.256 | 0.009 |
| <i>M. alba</i> × <i>M. rubra</i> 'Illinois Everbearing' | 449.273 | 26.014 | 3.309 | 1.761 | 3.978 | 0.132 | 0.009 |
| <i>M. alba</i> × <i>M. rubra</i> 'Ivory'                | 435.048 | 39.993 | 0.856 | 2.442 | 0.215 | 0.170 | 0.017 |
| <i>M. alba</i> × <i>M. rubra</i> 'French hybrid'        | 428.530 | 42.934 | 0.789 | 6.005 | 0.722 | 0.105 | 0.008 |
| <i>M. nigra</i> (L.)                                    | 395.073 | 17.690 | 0.844 | 3.767 | 0.687 | 0.007 | 0.005 |

**Supplementary Table S6:** The mean concentrations of the flavonoids (mg/100 g FW) in soroses of Slovenian, Hungarian old mulberry genotypes, sericultural and fruit varieties.

| Group name/Identification No.       | Quercetin derivatives | Kaempferol derivatives | Laricitrin hexoside | Flavanols | Flavanones | Flavones | Anthocyanins |
|-------------------------------------|-----------------------|------------------------|---------------------|-----------|------------|----------|--------------|
| <b>Slovenian mulberry genotypes</b> |                       |                        |                     |           |            |          |              |
| SE 5                                | 3.320                 | 0.130                  | 0.017               | 4.082     | 0.0512     | 0.002    | 0.000        |
| SE 9.2.                             | 4.414                 | 0.119                  | 0.079               | 75.984    | 0.102      | 0.005    | 171.247      |
| SE 9.1.                             | 4.393                 | 0.165                  | 0.104               | 54.172    | 0.087      | 0.005    | 157.059      |
| SE 19.2                             | 4.532                 | 0.250                  | 0.072               | 1.366     | 0.066      | 0.006    | 3.749        |
| SE 24                               | 3.084                 | 0.116                  | 0.042               | 38.403    | 0.059      | 0.007    | 42.840       |
| SE 290                              | 3.678                 | 0.099                  | 0.101               | 59.609    | 0.075      | 0.004    | 193.652      |
| SM 29                               | 4.162                 | 0.088                  | 0.009               | 1.219     | 0.088      | 0.015    | 45.915       |
| SM 100.1                            | 3.224                 | 0.113                  | 0.017               | 6.192     | 0.055      | 0.002    | 0.000        |
| SM 208                              | 3.270                 | 0.189                  | 0.008               | 1.325     | 0.039      | 0.002    | 0.000        |
| SM 214                              | 4.678                 | 0.173                  | 0.025               | 0.522     | 0.075      | 0.003    | 0.000        |
| SP 8                                | 3.950                 | 0.164                  | 0.099               | 11.049    | 0.081      | 0.005    | 118.709      |
| SP 10                               | 3.262                 | 0.102                  | 0.016               | 2.058     | 0.051      | 0.002    | 0.000        |
| SP 237                              | 3.298                 | 0.142                  | 0.009               | 1.398     | 0.062      | 0.016    | 15.823       |
| SP 249                              | 2.240                 | 0.092                  | 0.013               | 2.585     | 0.038      | 0.001    | 0.000        |
| SP 256                              | 4.830                 | 0.170                  | 0.058               | 293.181   | 0.127      | 0.005    | 483.511      |
| SP 272                              | 4.619                 | 0.086                  | 0.013               | 4.880     | 0.090      | 0.016    | 42.427       |
| SP 300                              | 4.320                 | 0.194                  | 0.019               | 2.168     | 0.068      | 0.003    | 0.000        |
| SP 306                              | 3.987                 | 0.161                  | 0.106               | 29.837    | 0.084      | 0.004    | 113.782      |
| <b>Hungarian mulberry genotypes</b> |                       |                        |                     |           |            |          |              |
| BA 2111                             | 5.107                 | 0.119                  | 0.115               | 126.798   | 0.118      | 0.005    | 293.735      |
| BA 2126                             | 1.702                 | 0.098                  | 0.009               | 2.946     | 0.028      | 0.001    | 0.000        |
| BA 2179                             | 5.090                 | 0.222                  | 0.073               | 44.164    | 0.098      | 0.006    | 131.322      |



|                                         |       |       |       |         |       |       |         |
|-----------------------------------------|-------|-------|-------|---------|-------|-------|---------|
| BE 1264.2                               | 6.278 | 0.147 | 0.033 | 1.105   | 0.078 | 0.008 | 5.330   |
| GMS 2357                                | 2.377 | 0.076 | 0.017 | 2.338   | 0.046 | 0.001 | 0.000   |
| PE 4                                    | 3.338 | 0.190 | 0.013 | 1.886   | 0.048 | 0.002 | 0.000   |
| PE 61214                                | 4.664 | 0.160 | 0.002 | 190.944 | 0.082 | 0.002 | 371.013 |
| SO 1035                                 | 3.585 | 0.145 | 0.067 | 1.548   | 0.051 | 0.004 | 18.801  |
| SO 2008                                 | 2.787 | 0.084 | 0.011 | 1.236   | 0.039 | 0.003 | 13.830  |
| SO 2018                                 | 3.954 | 0.096 | 0.013 | 1.309   | 0.071 | 0.017 | 8.816   |
| VA 1051                                 | 3.565 | 0.165 | 0.066 | 63.272  | 0.079 | 0.004 | 165.716 |
| VA 1056                                 | 1.676 | 0.032 | 0.007 | 0.433   | 0.029 | 0.005 | 9.590   |
| VA 2570                                 | 2.189 | 0.082 | 0.060 | 0.393   | 0.031 | 0.002 | 3.751   |
| VE 2620                                 | 1.431 | 0.076 | 0.010 | 1.469   | 0.027 | 0.001 | 0.000   |
| ZA 2041                                 | 4.521 | 0.121 | 0.031 | 272.166 | 0.123 | 0.004 | 526.283 |
| ZA 2044                                 | 4.604 | 0.202 | 0.027 | 0.247   | 0.084 | 0.004 | 0.000   |
| ZA 2045                                 | 2.372 | 0.050 | 0.008 | 7.908   | 0.044 | 0.008 | 41.366  |
| ZA 2047                                 | 2.651 | 0.058 | 0.009 | 0.455   | 0.044 | 0.003 | 2.178   |
| ZA 2053                                 | 6.636 | 0.171 | 0.065 | 163.955 | 0.123 | 0.005 | 315.250 |
| ZA 2084                                 | 4.967 | 0.226 | 0.099 | 53.468  | 0.105 | 0.005 | 228.300 |
| ZA 2095                                 | 4.903 | 0.128 | 0.002 | 102.683 | 0.075 | 0.002 | 349.878 |
| <b>Reference sericultural varieties</b> |       |       |       |         |       |       |         |
| <i>Morus alba</i> 'Florio'              | 2.123 | 0.041 | 0.005 | 1.512   | 0.040 | 0.002 | 9.668   |
| <i>M. alba</i> 'Kokusou'                | 5.765 | 0.260 | 0.097 | 62.855  | 0.125 | 0.006 | 168.818 |
| <i>M. alba</i> 'Morettiana'             | 2.555 | 0.093 | 0.028 | 1.423   | 0.049 | 0.004 | 0.000   |
| <i>M. alba</i> 'Muki'                   | 4.203 | 0.113 | 0.066 | 85.634  | 0.096 | 0.004 | 158.007 |
| <b>Fruit varieties</b>                  |       |       |       |         |       |       |         |
| <i>M. alba</i> × <i>rubra</i>           | 4.291 | 0.165 | 0.016 | 81.070  | 0.036 | 0.013 | 208.767 |
| <i>M. alba</i> (L.) 'Agathe'            | 2.951 | 0.119 | 0.004 | 8.036   | 0.016 | 0.004 | 36.823  |
| <i>M. alba</i> (L.) 'Red'               | 2.411 | 0.066 | 0.023 | 4.833   | 0.034 | 0.006 | 50.181  |
| <i>M. alba</i> (L.) 'White'             | 2.094 | 0.056 | 0.003 | 2.183   | 0.013 | 0.004 | 6.926   |

|                                                         |       |       |          |         |       |       |         |
|---------------------------------------------------------|-------|-------|----------|---------|-------|-------|---------|
| <i>M. alba</i> (L.) M 150/N 01 'Шелл № 150'             | 1.854 | 0.082 | 0.003    | 2.648   | 0.006 | 0.002 | 15.298  |
| <i>M. alba</i> (L.) s.l. 'Big Ten'                      | 8.178 | 0.170 | 0.001    | 370.840 | 0.227 | 0.033 | 624.259 |
| <i>M. alba</i> (L.) s.l. 'Black'                        | 3.147 | 0.120 | 0.003    | 154.230 | 0.034 | 0.009 | 159.286 |
| <i>M. alba</i> (L.) s.l. 'CREA fruit selection'         | 4.809 | 0.264 | 0.006    | 252.422 | 0.026 | 0.006 | 390.851 |
| <i>M. indica</i> (L.) 'Shin-Tso'                        | 0.552 | 0.015 | 9.53E-05 | 22.218  | 0.014 | 0.004 | 103.637 |
| <i>M. alba</i> (L.) s.l. 'Yellow roso'                  | 4.145 | 0.184 | 0.008    | 52.543  | 0.026 | 0.006 | 202.123 |
| <i>M. indica</i> (L.) 'Coree'                           | 2.494 | 0.010 | 0.001    | 16.677  | 0.052 | 0.018 | 95.778  |
| <i>M. alba</i> x <i>M. rubra</i> 'Illinois Everbearing' | 4.124 | 0.190 | 0.008    | 39.518  | 0.030 | 0.014 | 280.647 |
| <i>M. alba</i> x <i>M. rubra</i> 'Ivory'                | 3.738 | 0.063 | 0.012    | 180.200 | 0.035 | 0.004 | 438.129 |
| <i>M. alba</i> x <i>M. rubra</i> French hybrid          | 5.093 | 0.194 | 0.019    | 27.664  | 0.039 | 0.019 | 225.641 |
| <i>M. nigra</i> (L.)                                    | 1.526 | 0.033 | 6.91E-05 | 99.549  | 0.065 | 0.012 | 200.047 |

**Supplementary Table S7.** Pooled within-group correlations between variables and PC functions of the PCA diagram (see Fig. 2).

|                                            | PC 1   | PC 2   |
|--------------------------------------------|--------|--------|
| Fructose                                   | -0.157 | -0.055 |
| Glucose                                    | -0.162 | -0.055 |
| Xylose                                     | -0.237 | -0.027 |
| Acetic acid                                | -0.051 | 0.438  |
| Citric acid                                | 0.336  | -0.020 |
| Fumaric acid                               | -0.378 | -0.063 |
| Lactic acid                                | 0.216  | 0.080  |
| Malic acid                                 | -0.023 | 0.017  |
| Succinic acid                              | -0.006 | -0.159 |
| Tartaric acid                              | 0.084  | -0.350 |
| 3-Caffeoylquinic acid                      | 0.133  | 0.059  |
| 4-Caffeoylquinic acid                      | 0.031  | -0.154 |
| 5-Caffeoylquinic acid 1 (Chlorogenic acid) | 0.091  | -0.091 |
| 5-Caffeoylquinic acid 2                    | 0.106  | -0.149 |
| Dicaffeoylquinic acid 1                    | 0.100  | -0.246 |
| Dicaffeoylquinic acid 2                    | 0.055  | -0.001 |
| Dicaffeoylquinic acid 3                    | -0.007 | 0.004  |
| Caffeic acid                               | 0.041  | 0.132  |
| Caffeic acid hexoside 1                    | 0.095  | 0.055  |
| Caffeic acid hexoside 2                    | 0.031  | -0.089 |
| 3- <i>p</i> -coumaroylquinic acid          | 0.040  | -0.228 |
| 4- <i>p</i> -coumaroylquinic acid          | 0.100  | -0.073 |
| 5- <i>p</i> -Coumaroylquinic acid 1        | 0.020  | -0.089 |
| 5- <i>p</i> -Coumaroylquinic acid 2        | 0.136  | 0.043  |
| <i>p</i> -coumaric acid                    | 0.056  | -0.042 |
| <i>p</i> -coumaric acid hexoside           | 0.023  | -0.009 |
| 3-Feruloylquinic acid                      | 0.084  | -0.214 |
| 5-Feruloylquinic acid                      | 0.068  | 0.017  |
| Protocatechuic acid                        | -0.038 | 0.102  |
| Quercetin-3-galactoside                    | 0.087  | 0.101  |
| Quercetin-3-glucoside                      | 0.001  | 0.038  |
| Quercetin-3-rutinoside                     | 0.126  | 0.070  |
| Quercetin-3-xyloside                       | 0.001  | 0.029  |
| Quercetin-rutinoside hexoside              | 0.088  | -0.036 |
| Quercetin                                  | 0.067  | -0.085 |
| Quercetin dihexoside                       | 0.030  | -0.018 |
| Quercetin malonyl glucoside                | -0.096 | 0.021  |
| Quercetin rhamnosyl hexoside               | 0.013  | -0.044 |
| Kaempferol hexoside                        | -0.052 | 0.286  |
| Kaempferol-3-rutinoside                    | 0.062  | 0.005  |
| Laricitrin hexoside                        | -0.003 | 0.073  |

|                          |              |              |
|--------------------------|--------------|--------------|
| Catechin                 | 0.064        | 0.027        |
| Epicatechin              | 0.104        | 0.133        |
| Procyanidin dimer 1      | 0.117        | 0.099        |
| Procyanidin dimer 2      | 0.020        | 0.034        |
| Naringenin hexoside 1    | 0.115        | 0.005        |
| Naringenin hexoside 2    | -0.125       | 0.351        |
| Naringenin hexoside 3    | -0.171       | 0.214        |
| Isorhamnetin hexoside    | 0.113        | -0.019       |
| Cyanidin-3-glucoside     | 0.153        | 0.085        |
| Cyanidin-3-rutinoside    | 0.124        | 0.100        |
| Pelargonidin-3-glucoside | 0.161        | 0.062        |
| Total phenolics          | 0.503        | 0.188        |
| <b>Eigenvalue</b>        | <b>17.94</b> | <b>3.22</b>  |
| <b>% variance</b>        | <b>74.28</b> | <b>13.35</b> |
